# Supplementary material for: Radiofluorination of a Pre-formed Gallium(III) Aza-macrocyclic Complex: Towards Next-Generation Positron Emission Tomography (PET) Imaging Agents
Source: PubMed Central journal article supplement (PMC4515101; doi:10.1002/chem.201405812), 2015-02-04
Supplement: chem0021-4688-sd1.pdf [file chem0021-4688-sd1.pdf]

# CHEMISTRY

## A **European** Journal

### Supporting Information

#### **Radiofluorination of a Pre-formed Gallium(III) Aza-macrocyclic Complex: Towards Next-Generation Positron Emission Tomography (PET) Imaging Agents**

Rajiv Bhalla,<sup>[a]</sup> William Levason,<sup>[b]</sup> Sajinder K. Luthra,<sup>[c]</sup> Graeme McRobbie,<sup>[c]</sup>  
George Sanderson,<sup>[b]</sup> and Gillian Reid<sup>\*[b]</sup>

chem\_201405812\_sm\_miscellaneous\_information.pdf

## Supporting Information

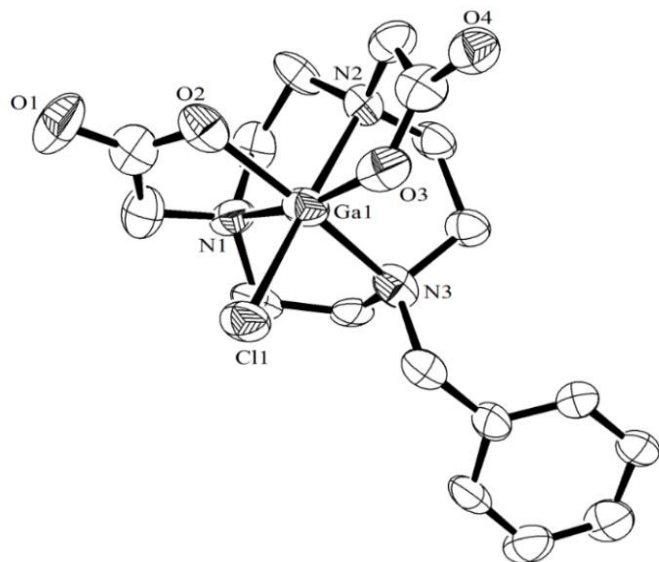

(a)

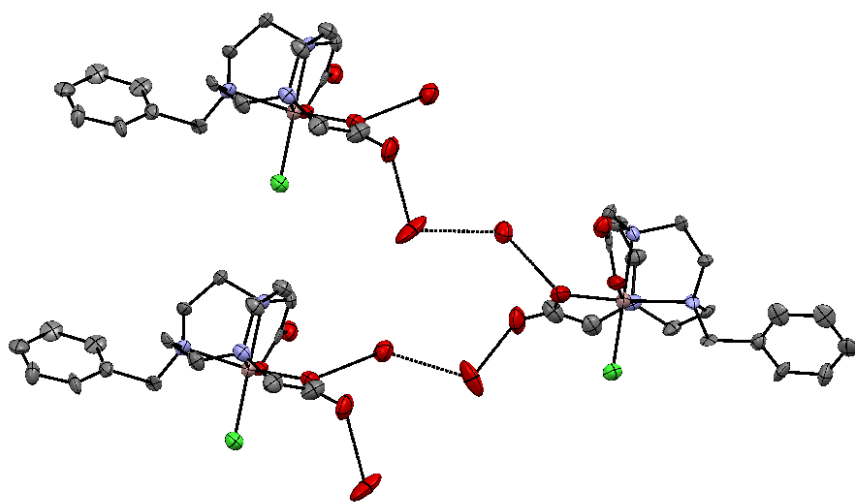

(b)

Figure S1 (a) ORTEP representation of the gallium species in  $[\text{GaCl}(\text{L})]\cdot 2\text{H}_2\text{O}$  with atom numbering scheme. H atoms are omitted for clarity (the H atoms associated with the lattice  $\text{H}_2\text{O}$  molecules were not located in the difference map). Thermal ellipsoids are drawn at 50% probability. Selected bond lengths ( $\text{\AA}$ ): Ga1–Cl1 2.266(4), Ga1–O2 1.888(13), Ga1–O4 2.010(11), Ga1–N1 2.122(11), Ga1–N2 2.094(13), Ga1–N3 2.147(13); (b) Diagram showing a portion of the extended H-bonded structure of  $[\text{GaCl}(\text{L})]\cdot 2\text{H}_2\text{O}$  (Ga = pink; Cl = green; O = red; N = blue; C = grey).

Table S1. Selected crystallographic data

| Complex                                                                                | [GaCl(L)]·2H <sub>2</sub> O                                       |
|----------------------------------------------------------------------------------------|-------------------------------------------------------------------|
| Formula                                                                                | C <sub>17</sub> H <sub>27</sub> ClGaN <sub>3</sub> O <sub>6</sub> |
| <i>M</i> / g mol <sup>-1</sup>                                                         | 474.59                                                            |
| Temp. / <i>K</i>                                                                       | 100(2)                                                            |
| Crystal system                                                                         | Monoclinic                                                        |
| Space group (no.)                                                                      | <i>P</i> 2 <sub>1</sub> / <i>c</i> (14)                           |
| <i>a</i> / Å                                                                           | 18.648(7)                                                         |
| <i>b</i> / Å                                                                           | 8.132(3)                                                          |
| <i>c</i> / Å                                                                           | 13.197(5)                                                         |
| $\alpha$ / °                                                                           | 90                                                                |
| $\beta$ / °                                                                            | 101.328(12)                                                       |
| $\gamma$ / °                                                                           | 90                                                                |
| <i>U</i> / Å <sup>3</sup>                                                              | 1962.2(13)                                                        |
| <i>Z</i>                                                                               | 4                                                                 |
| $\mu$ (Mo-K $\alpha$ ) mm <sup>-1</sup>                                                | 1.579                                                             |
| <i>F</i> (000)                                                                         | 984                                                               |
| Total reflections                                                                      | 9388                                                              |
| Unique reflections                                                                     | 4438                                                              |
| <i>R</i> <sub>int</sub>                                                                | 0.221                                                             |
| <i>R</i> <sub>1</sub> [ <i>I</i> <sub>o</sub> > 2 $\sigma$ ( <i>I</i> <sub>o</sub> )]  | 0.141                                                             |
| <i>R</i> <sub>1</sub> (all data)                                                       | 0.293                                                             |
| <i>wR</i> <sub>2</sub> [ <i>I</i> <sub>o</sub> > 2 $\sigma$ ( <i>I</i> <sub>o</sub> )] | 0.322                                                             |
| <i>wR</i> <sub>2</sub> (all data)                                                      | 0.412                                                             |

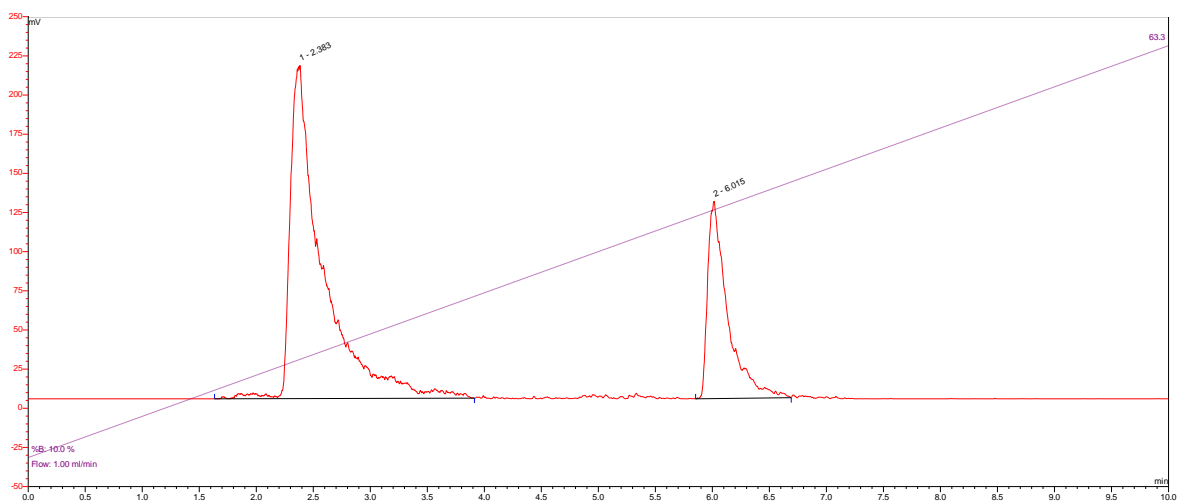

Figure S2: HPLC radio trace of the crude reaction mixture from the reaction of  $[\text{GaCl}(\text{L})] \cdot 2\text{H}_2\text{O}$  with  $^{18}\text{F}/^{18}\text{OH}_2$  in NaOAc (pH 4), stirred at room temperature for 30 mins. Rt 2.4 mins (70%)  $^{18}\text{F}^-$ , Rt 6.0 mins (27%)  $[\text{Ga}^{18}\text{F}(\text{L})]$ .

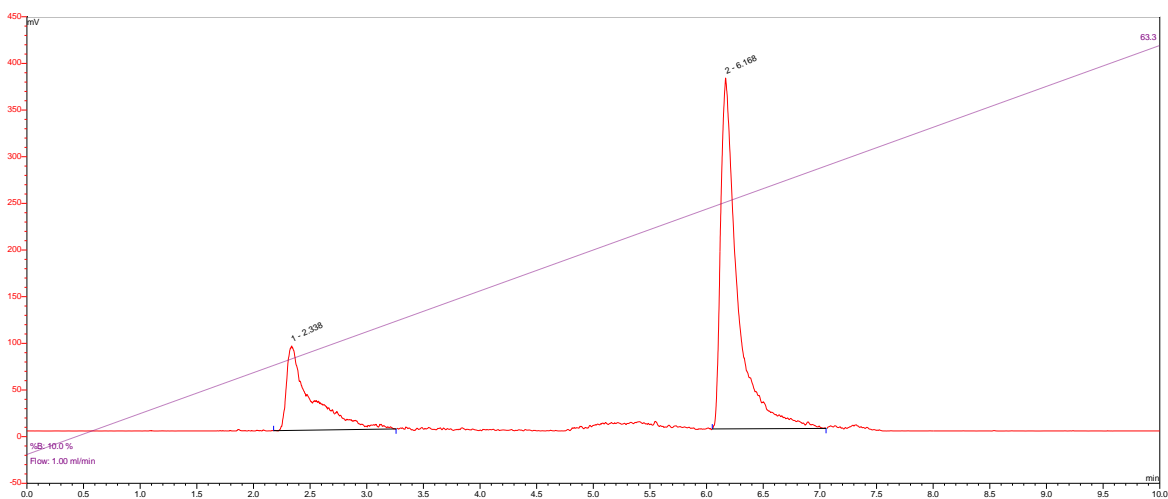

Figure S3: HPLC radio trace of the crude reaction mixture from the reaction of  $[\text{GaCl}(\text{L})] \cdot 2\text{H}_2\text{O}$  with  $^{18}\text{F}/^{18}\text{OH}_2$  in NaOAc (pH 4), heated to  $80^\circ\text{C}$  for 30 mins. Rt 2.3 mins (30%)  $^{18}\text{F}^-$ , Rt 6.2 mins (70%)  $[\text{Ga}^{18}\text{F}(\text{L})]$ .

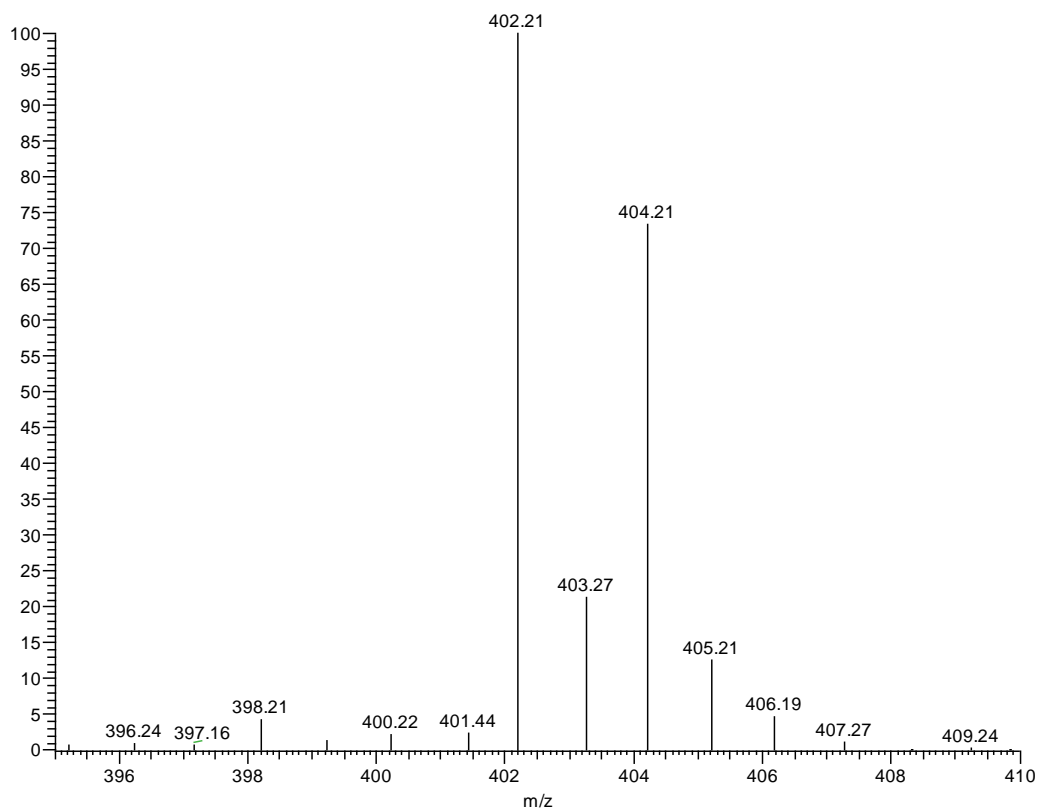

Figure S4: ESI<sup>+</sup> mass spectrum and isotope pattern for [Ga(L)]<sup>+</sup>  $m/z = 402.2$  (100%).

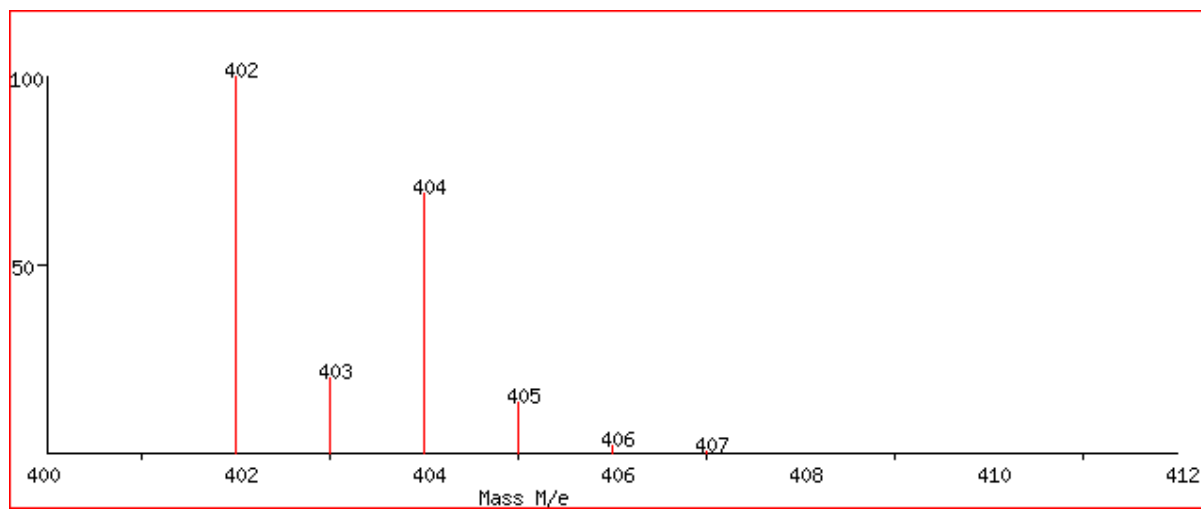

Figure S5: Predicted peak position and isotope pattern for the species [Ga(L)]<sup>+</sup>.

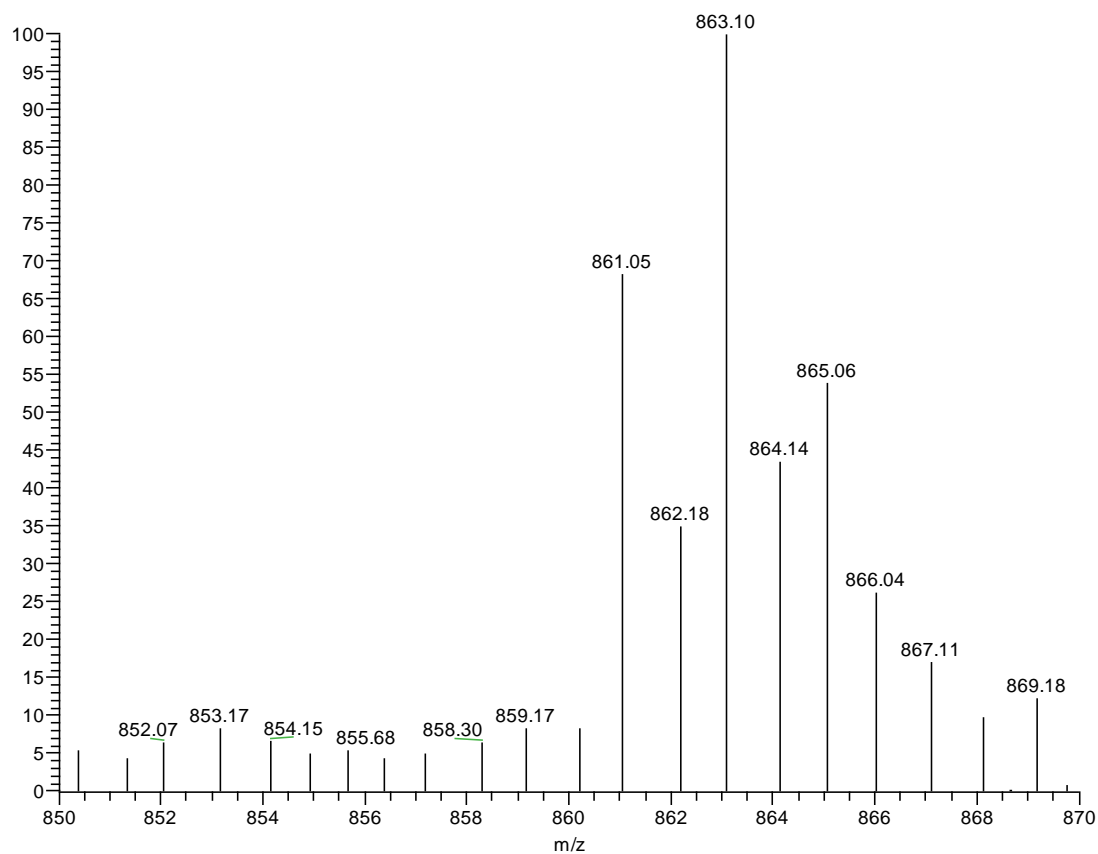

Figure S6: ESI<sup>+</sup> mass spectrum and isotope pattern for  $[\{\text{GaF}(\text{L})\}_2 + \text{H}_3\text{O}]^+$   $m/z$  863.1 (100%).

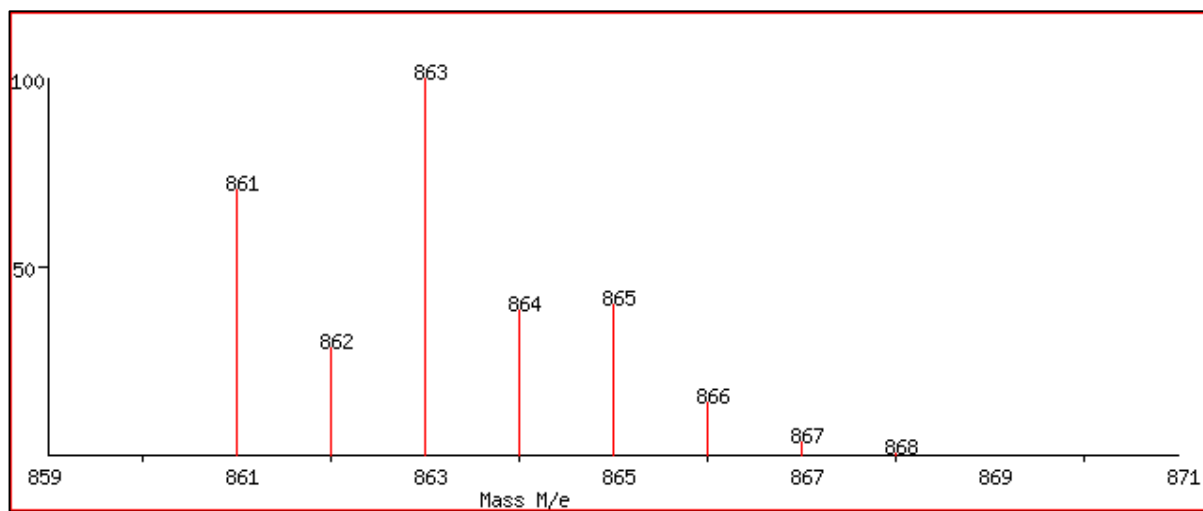

Figure S7: Predicted peak position and isotope pattern for the species  $[\{\text{GaF}(\text{L})\}_2 + \text{H}_3\text{O}]^+$ .

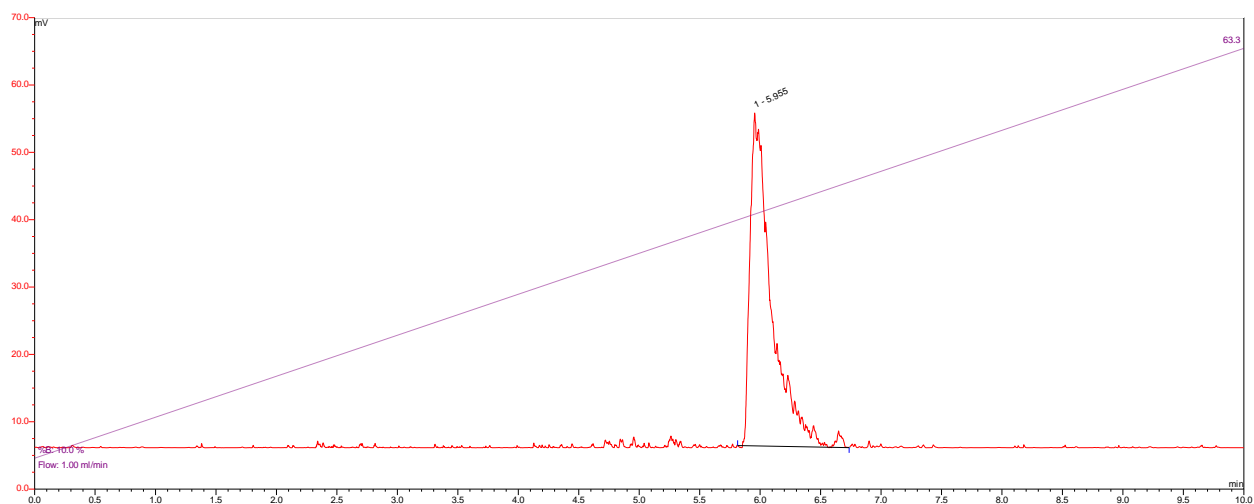

Figure S8a: HPLC radio trace of the HLB purified product formulated in 10% EtOH/NaOAc (pH 6) at t = 20 mins. Rt 6.0 mins (99%) [ $\text{Ga}^{18}\text{F}(\text{L})$ ].

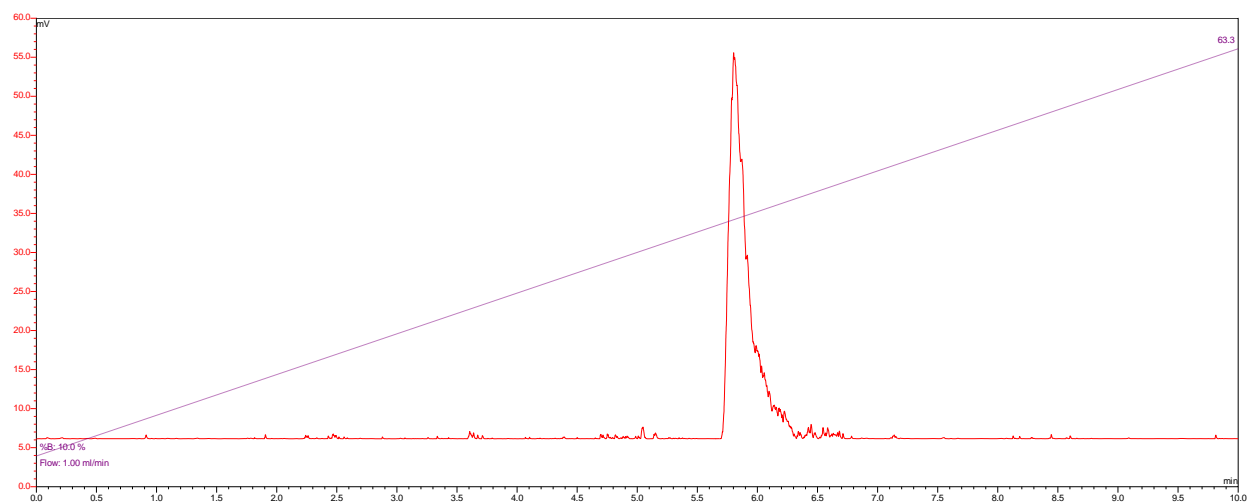

Figure S8b: HPLC radio trace of the HLB purified product formulated in 10% EtOH/NaOAc (pH 6) at t = 45 mins. Rt 5.9 mins (99%) [ $\text{Ga}^{18}\text{F}(\text{L})$ ].

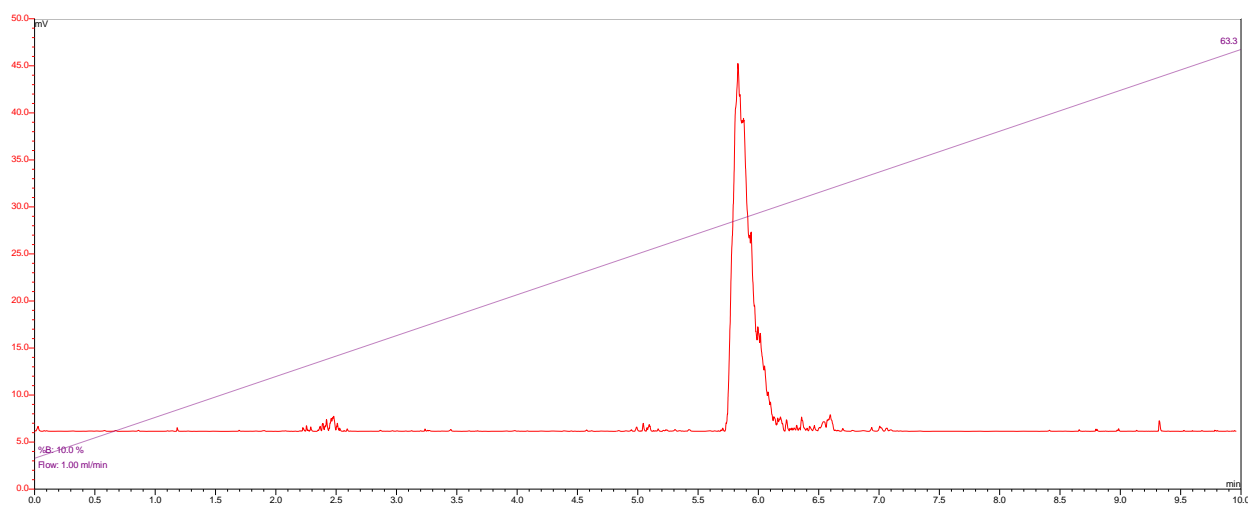

Figure S8c: HPLC radio trace of the HLB purified product formulated in 10% EtOH/NaOAc (pH 6) at t = 90 mins. Rt 5.9 mins (96%) [ $\text{Ga}^{18}\text{F}(\text{L})$ ].

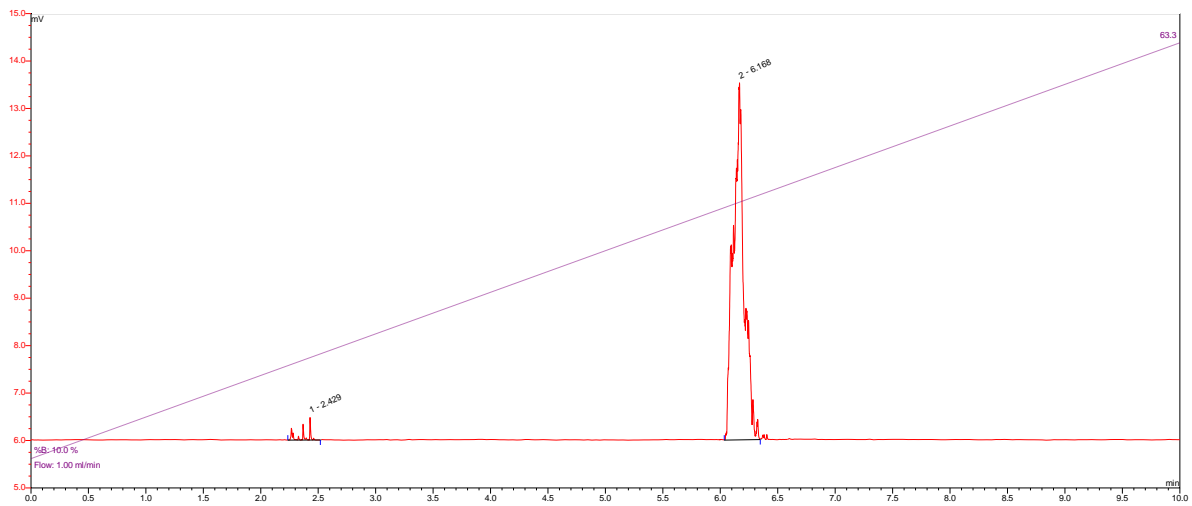

Figure S9a: HPLC radio trace of the HLB purified product formulated in 10% EtOH/PBS (pH 7.5) at t = 'zero'. Rt 2.4 mins (2%)  $^{18}\text{F}^-$ , Rt 6.2 mins (98%) [ $\text{Ga}^{18}\text{F}(\text{L})$ ].

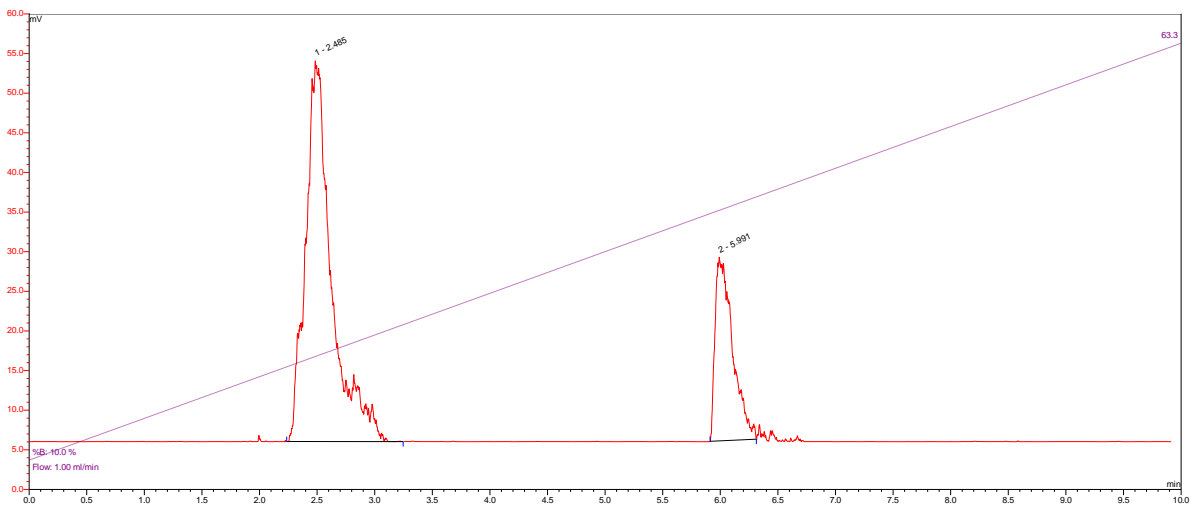

Figure S9b: HPLC radio trace of the HLB purified product formulated in 10% EtOH/PBS (pH 7.5) at t = 45 mins. Rt 2.5 mins (55%)  $^{18}\text{F}^-$ , Rt 6.0 mins (45%) [ $\text{Ga}^{18}\text{F}(\text{L})$ ].

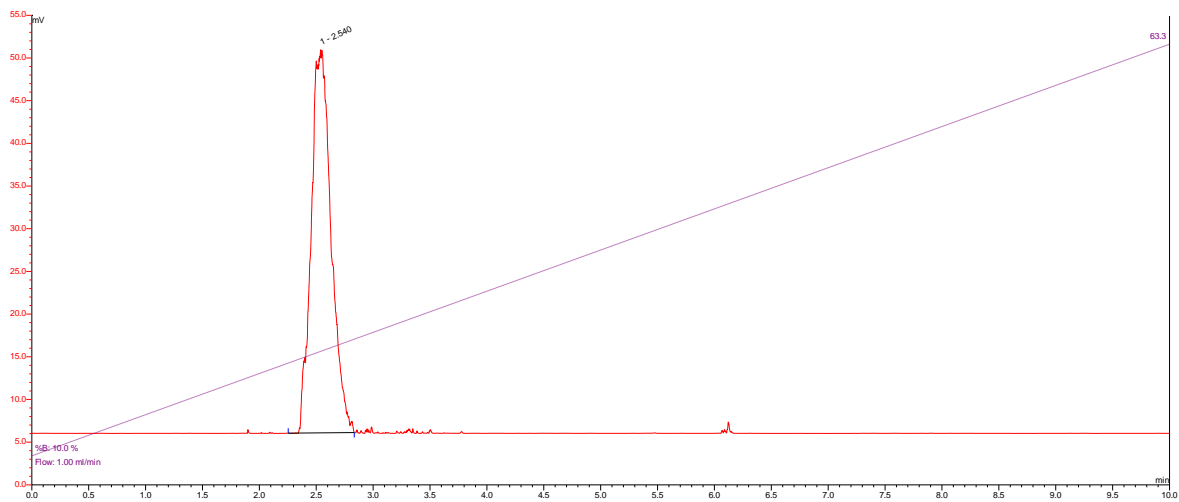

Figure S9c: HPLC radio trace of the HLB purified product formulated in 10% EtOH/PBS (pH 7.4) at t = 120 mins. Rt 2.5 mins (100%)  $^{18}\text{F}^-$ .





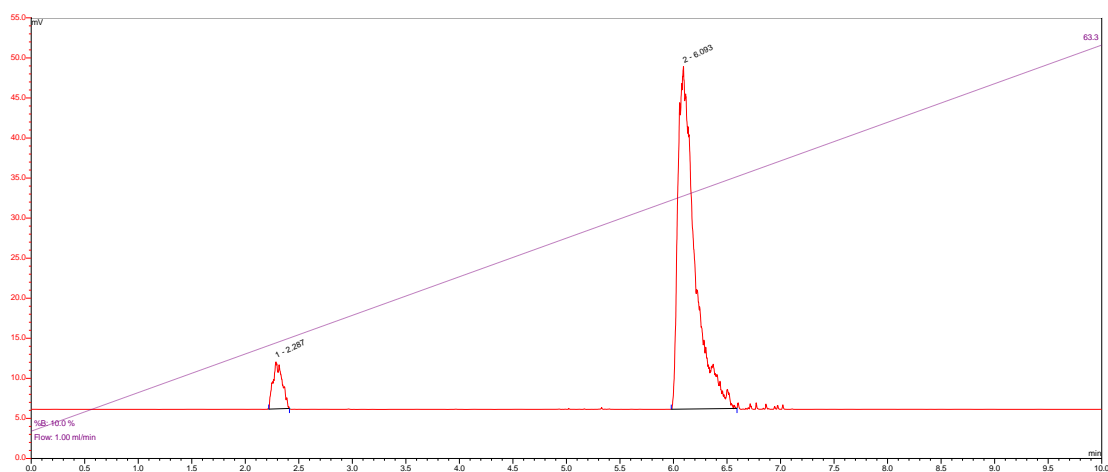

Figure S10a: HPLC radio trace of the HLB purified product formulated in 10% EtOH/HSA (pH 7.5) at t = 'zero'. Rt 2.3 mins (7%)  $^{18}\text{F}^-$ , Rt 6.2 mins (93%)  $[\text{Ga}^{18}\text{F}(\text{L})]$ .

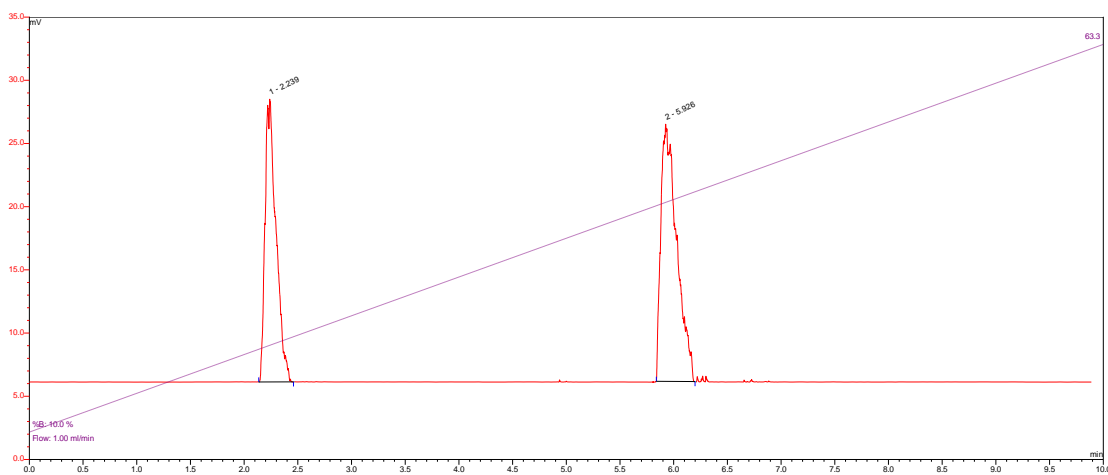

Figure S10b: HPLC radio trace of the HLB purified product formulated in 10% EtOH/HSA (pH 7.5) at t = 30 mins. Rt 2.2 mins (43%)  $^{18}\text{F}^-$ , Rt 6.2 mins (57%)  $[\text{Ga}^{18}\text{F}(\text{L})]$ .

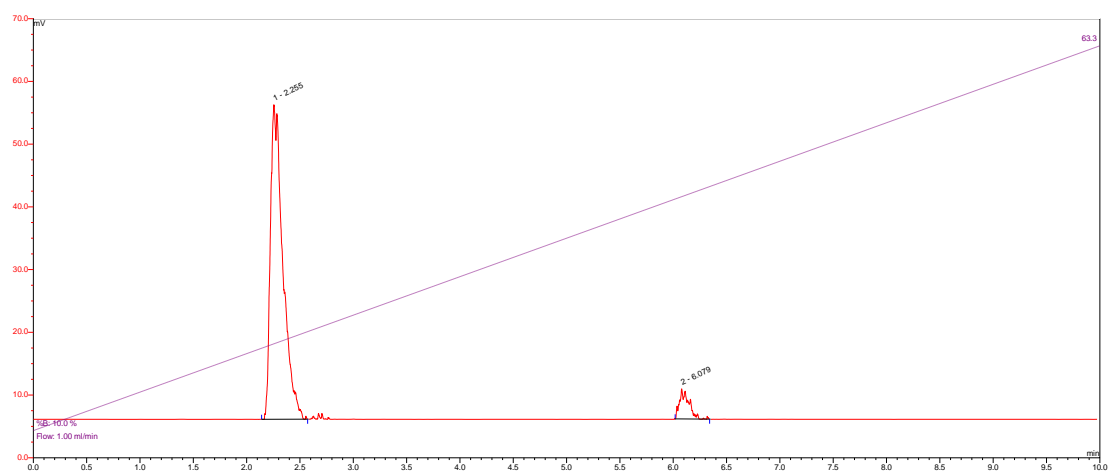

Figure S10c: HPLC radio trace of the HLB purified product formulated in 10% EtOH/HSA (pH 7.5) at t = 90 mins. Rt 2.3 mins (93%)  $^{18}\text{F}^-$ , Rt 6.1 mins (7%)  $[\text{Ga}^{18}\text{F}(\text{L})]$ .

Table S2 % RCP of specific formulations as a function of time

| Formulation (pH)#                    | RCP/% (time/<br>mins.)* |         |          |          |
|--------------------------------------|-------------------------|---------|----------|----------|
| EtOH/PBS (7.5)                       | 98 (0)                  | 40 (30) | 25 (45)  | 2 (120)  |
| HSA (7.4)                            | 93 (0)                  | 57 (30) | 7 (90)   |          |
| EtOH/H <sub>2</sub> O (7)            | 91 (0)                  | 76 (30) | 34 (120) | 0 (180)  |
| EtOH/10mM<br>NH <sub>4</sub> OAc (7) | 90 (0)                  | 49 (30) | 9 (45)   | 4 (90)   |
| EtOH/NaOAc (6)                       | 99 (20)                 | 99 (45) | 96 (90)  | -        |
| EtOH/NaOAc (5)                       | 99 (45)                 | 99 (90) | 99 (180) | -        |
| EtOH/NaOAc (4)                       | 99 (0)                  | 99 (90) | 99 (120) | 99 (240) |

# EtOH volume was approximately 10% of total formulation volume (e.g. 0.1 mL EtOH in 1 mL formulated product).

\* RCP estimated from integration of radiochemical peaks in HPLC chromatographs.
